# Supplementary figures and images for: Lovastatin induces apoptosis of ovarian cancer cells and synergizes with doxorubicin: potential therapeutic relevance
Source: Springer Nature journal article supplement (doi:10.1186/1471-2407-10-103), 2010-03-18

**A**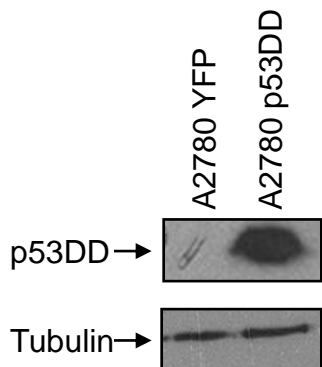**B**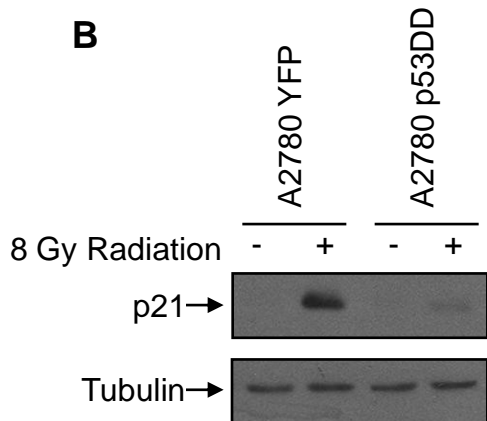**C**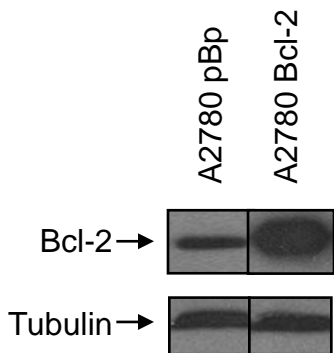**D**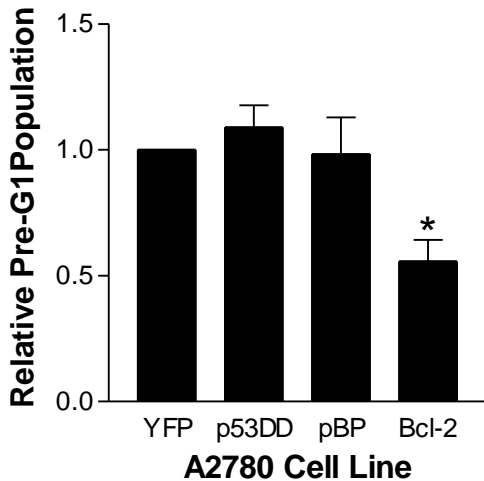

Supplement: 12885_2009_1902_MOESM5_ESM.pdf [file 12885_2009_1902_MOESM5_ESM.pdf]

### Accumulation

### Retention

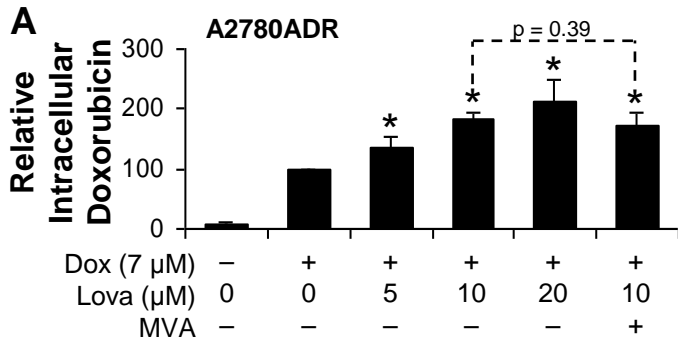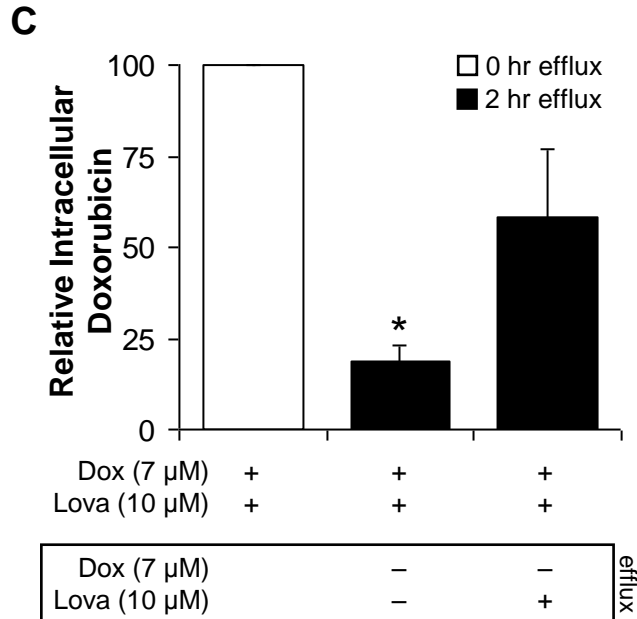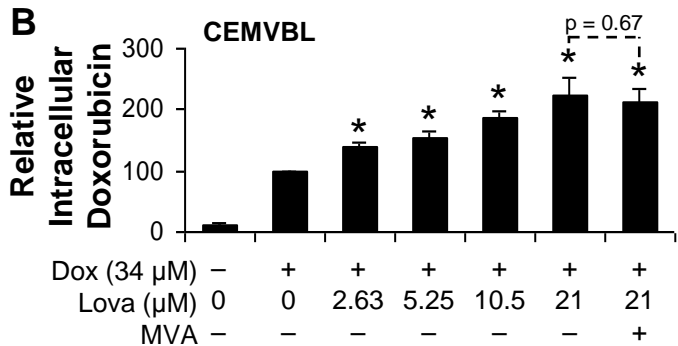

Supplement: 12885_2009_1902_MOESM7_ESM.pdf [file 12885_2009_1902_MOESM7_ESM.pdf]
